# Supplementary material for: Gating interactions steer loop conformational changes in the active site of the L1 metallo-β-lactamase
Source: eLife. 2023 Feb 24;12:e83928. doi: 10.7554/eLife.83928 (PMC9977270; doi:10.7554/eLife.83928)
Supplement: Figure 2—source data 1. [file elife-83928-fig2-data1.xlsx]

## Sheet: Sheet1
0.0 ± 0.0	2097.6 ± 76.1	44969.5 ± 5863.2	82.5 ± 5.6	1425 ± 36.4	17669.0 ± 1516.0	283.2 ± 15.2
7860.7 ± 700.8	0.0 ± 0.0	44670.0 ± 5860.2	3320.1 ± 172.9	1135.7 ± 25.2	17389.4 ± 1517.6	31.0 ± 2.6
8865.2 ± 694.8	2746 ± 123.0	0.0 ± 0.0	4317.8 ± 186.3	1547.9 ± 121.1	18083.5 ± 1538.7	677.6 ± 87.7
3504.6 ± 464.9	2007.6 ± 76.0	44881.9 ± 5962.8	0.0 ± 0.0	1338.1 ± 36.2	17581.6 ± 1515.7	196.7 ± 14.2
8211.0 ± 698.5	2102.0 ± 66.4	44432.6 ± 5953.0	3663.7 ± 167.9	0.0 ± 0.0	17411.6 ± 1516.9	58.1 ± 1.3
9195.1 ± 719.2	3098.1 ± 166.4	45713.7.7 ± 5887.8	4647.5 ± 214.0	2152.1 ± 134.5	0.0 ± 0.0	1072.0 ± 127.4
8071.2 ± 698.8	1970.7 ± 66.2	44580.4 ± 5859.1	3523.2 ± 168.2	1019.6 ± 23.9	17327.4 ± 1517.2	0.0 ± 0.0
